# Supplementary material
Source: publisher site journal article supplement (https://www.dovepress.com/article/566896)
Supplement: Supplementary file 1 [file 566896%20Revised%20%2509Table%20S1.pdf]

Table S1 Information on antibodies used in Western blotting (WB)

| antibody name | Primary antibody information |             |                        |                         |                | secondary antibody information |            |             |                |
|---------------|------------------------------|-------------|------------------------|-------------------------|----------------|--------------------------------|------------|-------------|----------------|
|               | origin                       | Item Number | molecular weight (kDa) | primary antibody source | dilution ratio | secondary antibody             | origin     | Item Number | dilution ratio |
| GAPDH         | Servicebio                   | GB15004     | 36                     | Rabbit                  | 1: 1000        | HRP-Goat Anti-Rabbit           | Servicebio | GB23303     | 1: 5000        |
| GRP78         | Servicebio                   | GB11098     | 78                     | Rabbit                  | 1: 1000        | HRP-Goat Anti-Rabbit           | Servicebio | GB23303     | 1: 5000        |
| CHOP          | Abclonal                     | A0221       | 27                     | Rabbit                  | 1: 1000        | HRP-Goat Anti-Rabbit           | Servicebio | GB23303     | 1: 5000        |
| Caspase12     | Servicebio                   | GB111695    | 48                     | Rabbit                  | 1: 1000        | HRP-Goat Anti-Rabbit           | Servicebio | GB23303     | 1: 5000        |
| Bcl2          | Servicebio                   | GB124830    | 26                     | Mouse                   | 1: 1000        | HRP-goat anti-mouse            | Servicebio | GB23301     | 1: 5000        |
| Bax           | Servicebio                   | GB12690     | 21                     | Mouse                   | 1: 1000        | HRP-goat anti-mouse            | Servicebio | GB23301     | 1: 5000        |
